# Supplementary material for: The Electrically Silent Kv6.4 Subunit Confers Hyperpolarized Gating Charge Movement in Kv2.1/Kv6.4 Heterotetrameric Channels
Source: PubMed Central journal article supplement (PMC3355112; doi:10.1371/journal.pone.0037143), 2012-05-17

Figure S1

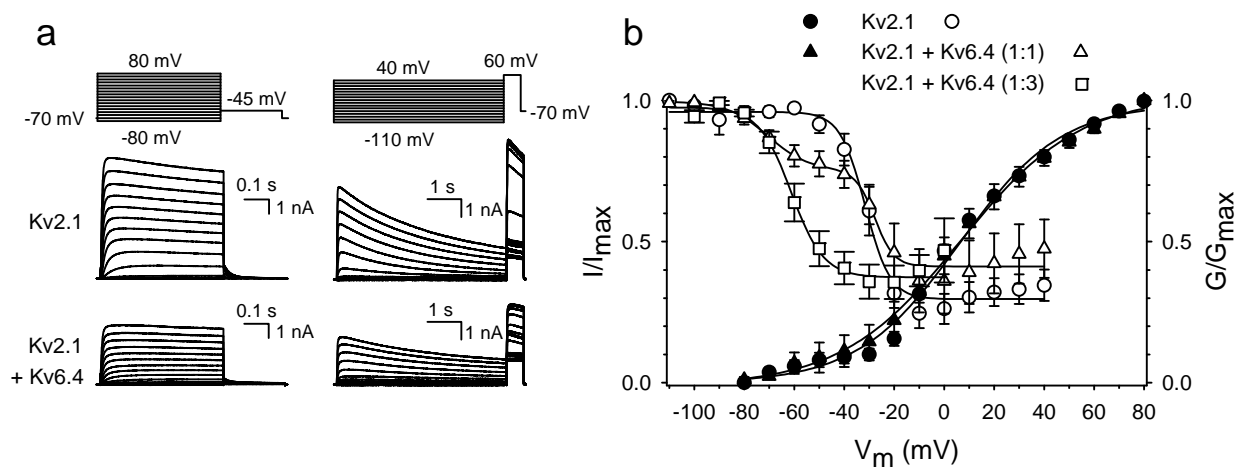

Supplement: pone.0037143.s002.pdf [file pone.0037143.s002.pdf]
