# Supplementary material for: The Electrically Silent Kv6.4 Subunit Confers Hyperpolarized Gating Charge Movement in Kv2.1/Kv6.4 Heterotetrameric Channels
Source: PubMed Central journal article supplement (PMC3355112; doi:10.1371/journal.pone.0037143), 2012-05-17
Supplement: pone.0037143.s003.pdf [file pone.0037143.s003.pdf]

**Supplementary Table 1**

|               | 1 <sup>st</sup> component |            | 2 <sup>nd</sup> component |           | n |
|---------------|---------------------------|------------|---------------------------|-----------|---|
|               | V <sub>1/2</sub> (mV)     | k          | V <sub>1/2</sub> (mV)     | k         |   |
| GV curve      |                           |            |                           |           |   |
| Kv2.1         | 4.9 ± 3.0                 | 19.8 ± 1.4 | n.a                       | n.a       | 7 |
| Kv2.1 + Kv6.4 | 2.5 ± 6.8                 | 18.3 ± 0.9 | n.a                       | n.a       | 6 |
| Inactivation  |                           |            |                           |           |   |
| Kv2.1         | n.a                       | n.a        | -32.9 ± 3.0               | 4.1 ± 0.4 | 6 |
| Kv2.1 + Kv6.4 | -72.0 ± 2.6               | 8.0 ± 1.1  | -25.1 ± 2.8               | 3.7 ± 0.1 | 5 |
